# Supplementary material for: Examining and Improving the Gender and Language DIF in the VERA 8 Tests
Source: MDPI journal article supplement (doi:10.3390/psych4030030), 2022-07-06
Supplement: s1 [file s1]

## Supplementary File

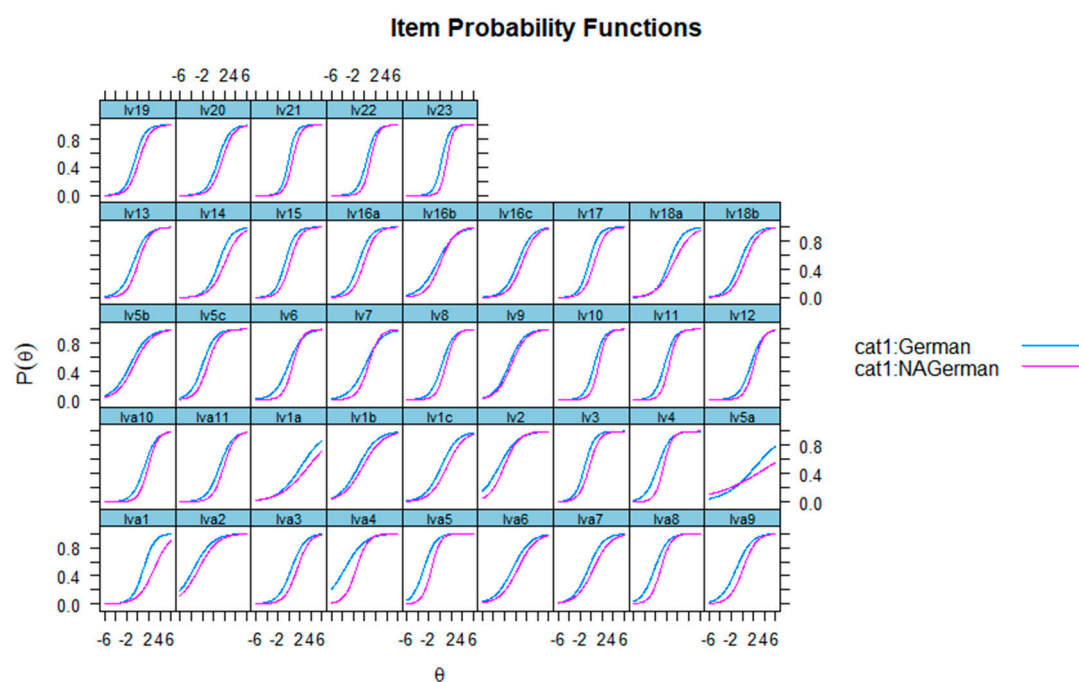

Figure S1. Item probability functions of reading test items across language groups.

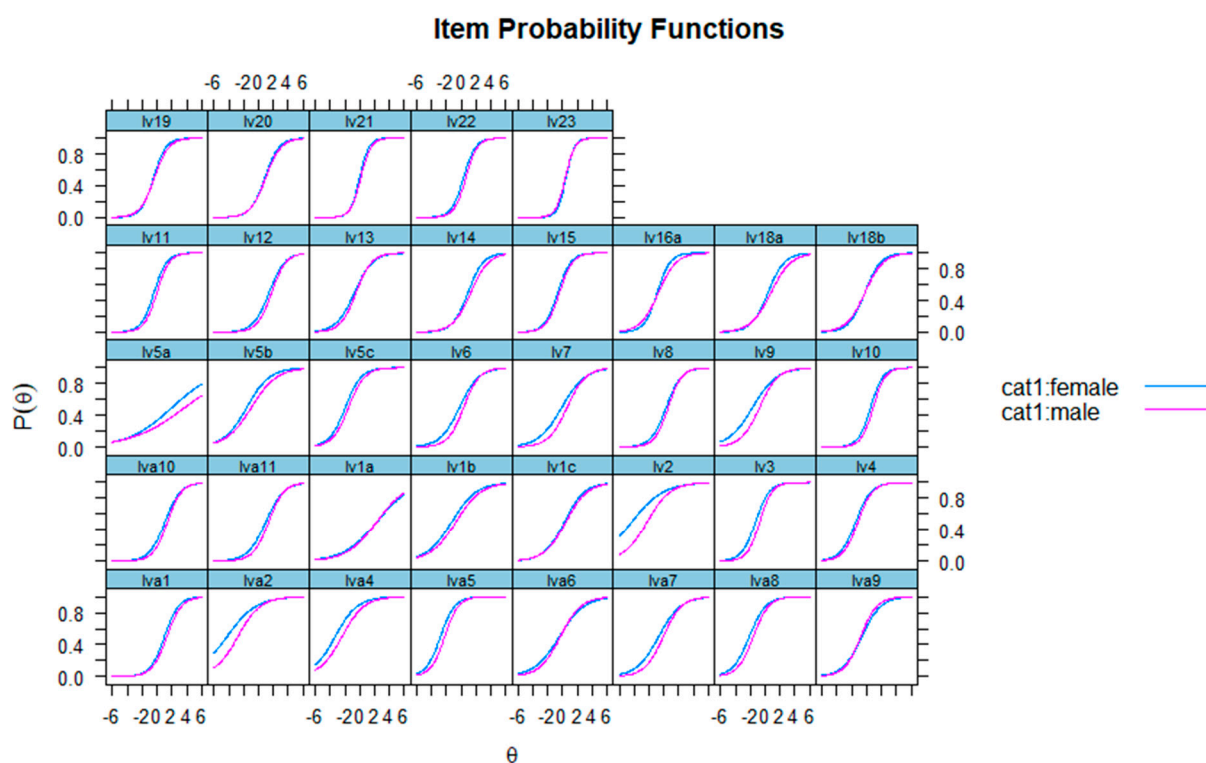

Figure S2. Item probability functions of reading test items across gender groups.
